# Supplementary material for: Short-Term Cold Stress Affects Parasitism on the Asian Chestnut Gall Wasp Dryocosmus kuriphilus
Source: PubMed Central journal article supplement (PMC7760994; doi:10.3390/insects11120841), 2020-11-28
Supplement: insects-11-00841-s001.pdf [file insects-11-00841-s001.pdf]

Data Supplemental to “Short-Term Cold Stress Affects Parasitism on the Asian Chestnut Gall Wasp *Dryocosmus kuriphilus*”

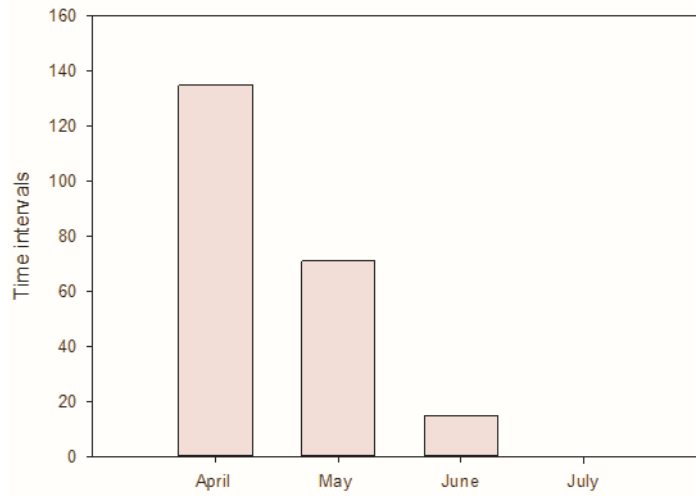

**Figure S1.** Relationship among monitoring months and interval time with daily minimum temperature lower than or equal to 8.5 degrees for 4 consecutive days (the data refer to twenty years, 2000–2019). Historical data were collected from the meteorological station that monitored the study area.

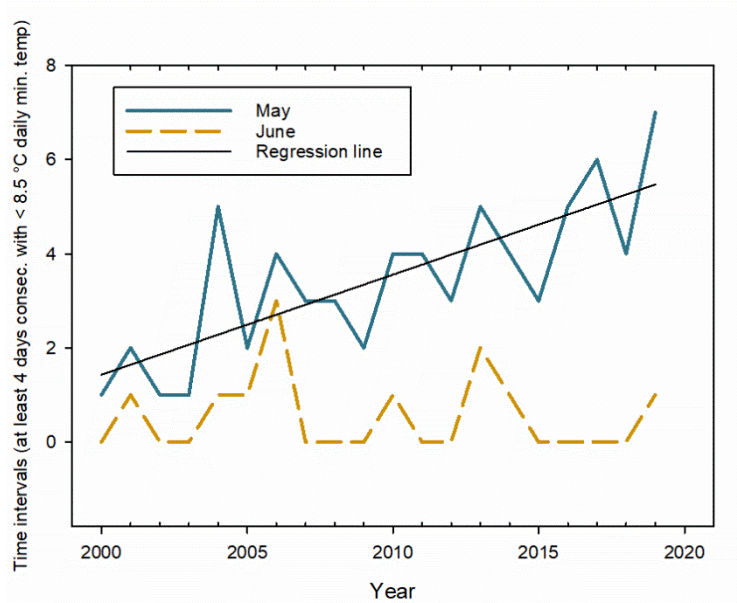

**Figure S2.** Relationship among years (May and June) and interval time with daily minimum temperature lower than or equal to 8.5 °C for at least 4 consecutive days (the data refer to twenty years, 2000–2019). Historical data were collected from the meteorological station that monitored the study area (n° 2465). Regression line on May ( $f = y_0 + a \cdot x$ ; R square = 0.569; df = 2, 18;  $p < 0.001$ ).

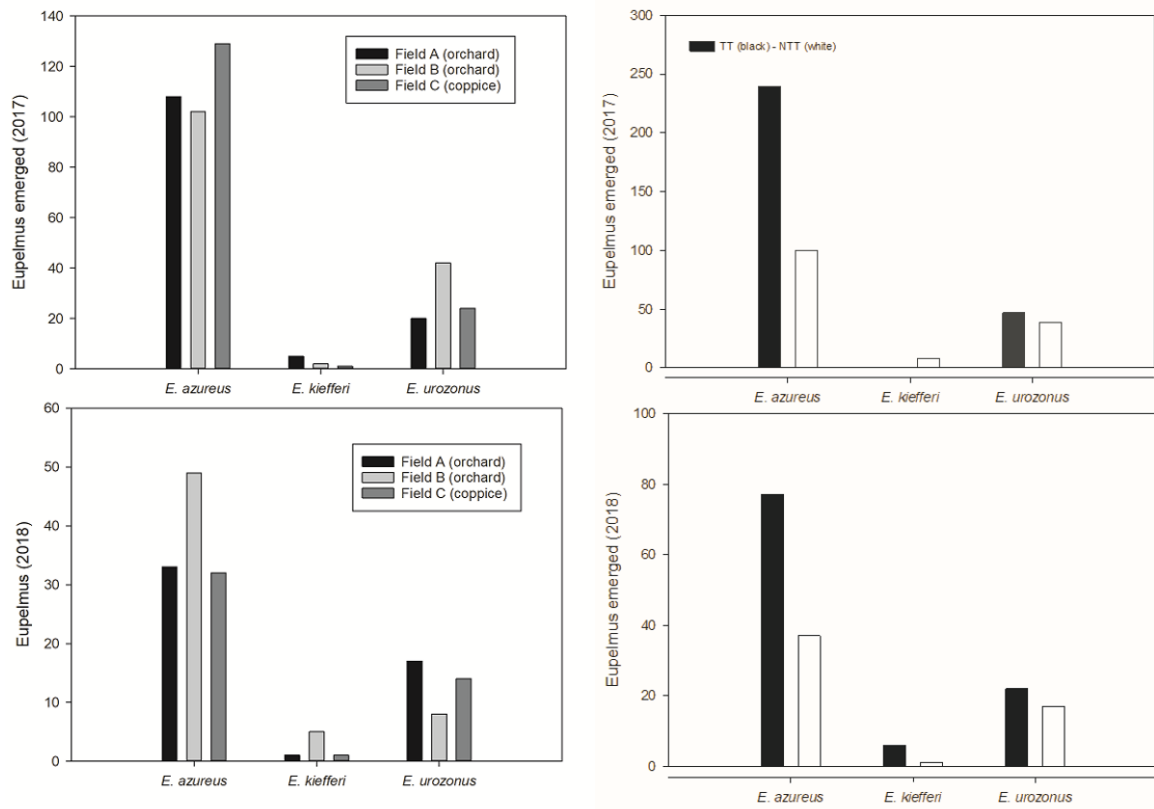

**Figure S3.** Relationship among *Eupelmus* species at different chestnut fields (two orchards and one coppice) (left) and at different treatments (NTT = no temperature treatment, TT = temperature treatment).

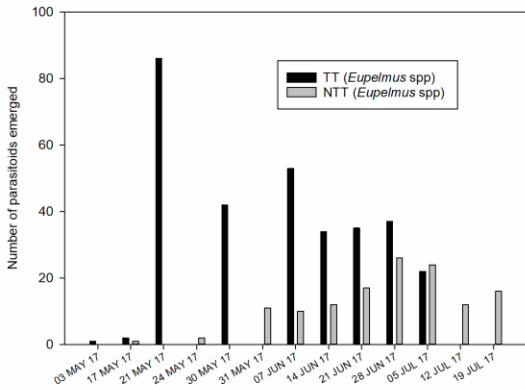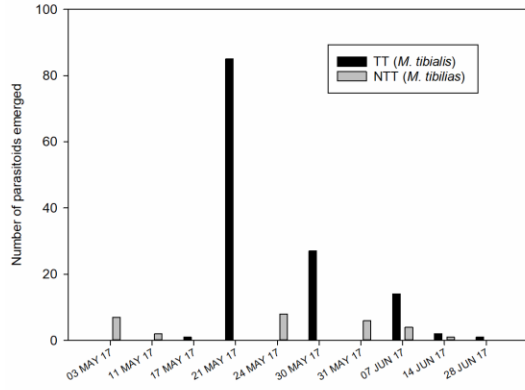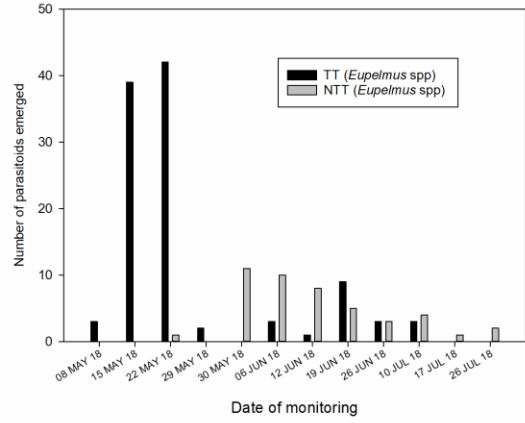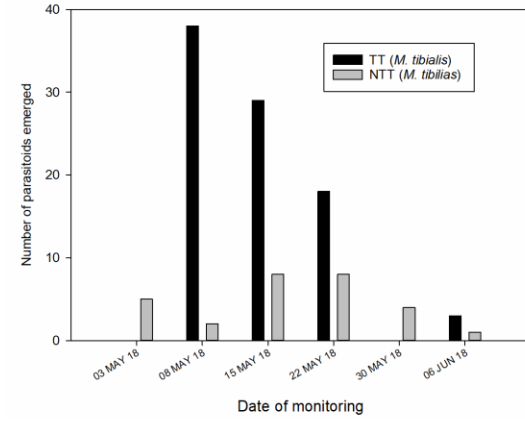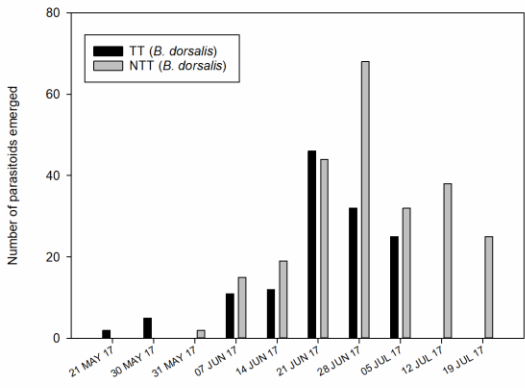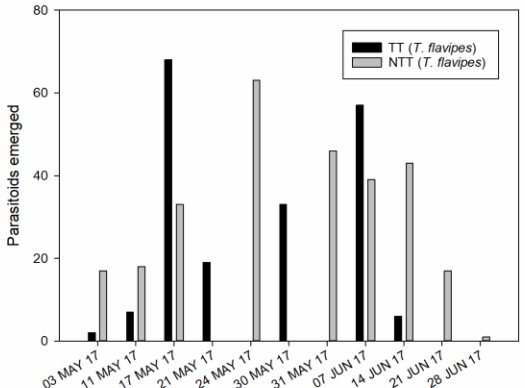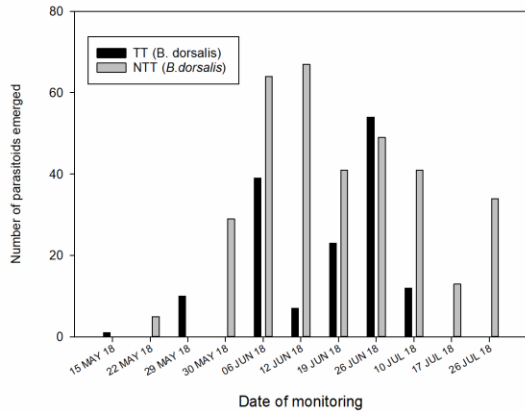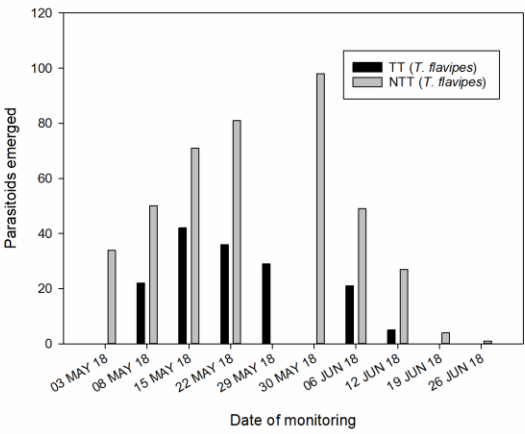

**Figure S4.** Relationships among the date of monitoring of the galls and some emergent parasitoids. *Eupelmus* sp (2017: log.Lik<sub>12,443</sub> = 173.44,  $p < 0.001$ ; 2018: log.Lik<sub>11,150</sub> = 99.52,  $p < 0.001$ ), *Mesopolobus tibialis* (2017: log.Lik<sub>9158</sub> = 132.10,  $p < 0.001$ ; 2018: log.Lik<sub>5116</sub> = 37.04,  $p < 0.001$ ), *Bootanymyia dorsalis* (2017: log.Lik<sub>9376</sub> = 61.10,  $p < 0.001$ ; 2018: log.Lik<sub>10,489</sub> = 105.68,  $p < 0.001$ ) and *Torymus flavipes* (2017: log.Lik<sub>9158</sub> = 124.73,  $p < 0.001$ ; 2018: log.Lik<sub>5116</sub> = 37.10,  $p < 0.001$ ) are compared by way of example (NTT = no temperature treatment, TT = temperature treatment).
